# Supplementary material for: A Novel Mutation in Sacsin, p.Val1335IIe, May Cause Late-Onset Sacsinopathy Due to Haploinsufficiency
Source: MDPI journal article supplement (doi:10.3390/cimb45120619), 2023-12-09
Supplement: s1 [file s1]

**Supplementary Table S1. Ataxia-related genes in patient.** Ataxia-related genes were predicted its pathogenicity and its results did not be pathogenic. This means that these genes are difficult to see as disease-causing genes.

| Gene  | Disorder                                             | Mutation                                         | SIFT / Polyphen-2   | Frequency (1000g_EAS) |
|-------|------------------------------------------------------|--------------------------------------------------|---------------------|-----------------------|
| ATXN3 | Machado-Joseph Disease                               | rs1048755 (c.634G>A, p.V212M)                    | Tolerated / Benign  | 0.4405                |
|       |                                                      | c.67_68insCAGCAGCAGCA<br>GCAGCAGCAGCAGCAGC<br>AG | NA                  | NA                    |
| FXN   | Friedreich ataxia                                    | synonymous SNV                                   | -                   | -                     |
| GFAP  | Alexander Disease                                    | rs9916491 (c.1276A>G, p.T426A)                   | Tolerated / Benign  | 0.251                 |
|       |                                                      | rs1126642<br>(c.883G>A;p.D295N)                  | Damaging / Damaging | 0.1359                |
| KIF1A | Spastic paraplegia 30                                | synonymous SNV                                   | -                   | -                     |
|       |                                                      | rs10594016<br>(c.2751_2753del/p.917_918del)      | NA                  | NA                    |
| KIF1C | Spastic Ataxia 2                                     | synonymous SNV                                   | -                   | -                     |
| MARS2 | Spastic Ataxia 3                                     | -                                                | -                   | -                     |
| MTTP  | Abetalipoproteinemia                                 | rs2306986 (c.294G>C, p.E98D)                     | Tolerated / Benign  | 0.5143                |
|       |                                                      | rs3792683 (c.497AG, p.N166S)                     | Tolerated / Benign  | 0.5143                |
|       |                                                      | rs2306985 (c.891C>G, p.H297Q)                    | Tolerated / Benign  | 0.6706                |
| SPART | Troyer syndrome                                      | -                                                | -                   | -                     |
| SPG7  | Spastic paraplegia 7                                 | -                                                | -                   | -                     |
| TTPA  | Autosomal recessive ataxia with vitamin E deficiency | -                                                | -                   | -                     |
